# Supplementary material for: Education, Age and Gender: Critical Factors in Determining Interventions for Child Brick Workers in Pakistan and Afghanistan
Source: MDPI journal article supplement (doi:10.3390/ijerph19116797), 2022-06-02
Supplement: s1 [file s1]

# **Education, Age and Gender: Critical Factors in Determining Interventions for Child Brick Workers in Pakistan and Afghanistan**

**Catherine Pellenq, Laurent Lima and Susan Gunn**

**Supplementary Material: Tables of factorial ANOVAs (adapted from SPSS output files) testing for between subjects effects.**

**Section S1: Tables for the factor «negative emotions»**

**Section S2: Tables for the factor «maltreatment»**

**Section S3: Tables for the factor «personal security»**

## Section S1: Tables for the factor «negative emotions»

| Factors       | values | N                   |
|---------------|--------|---------------------|
| Gender Female | 0.00   | 699                 |
|               | 1.00   | 235                 |
| Age category  | 1.00   | 8 to 13 years old   |
|               | 2.00   | 14 to 17 years old  |
| Work & school | 1.00   | Worker no school    |
|               | 2.00   | Worker + school     |
|               | 3.00   | nonworker_no school |
|               | 4.00   | Nonworker +school   |

### Tests of beetwen-subjects effets

Dependant variable: negative emotions

|                                         | Sum of squares<br>type III | ddl | Mean square | F        | Signification | Eta-squared<br>(size effect ) |
|-----------------------------------------|----------------------------|-----|-------------|----------|---------------|-------------------------------|
| Corrected model                         | 44,957.474                 | 15  | 2997.165    | 13.299   | 0.000         | 0.179                         |
| Constant                                | 598,170.097                | 1   | 598,170.097 | 2654.226 | 0.000         | 0.743                         |
| female                                  | 1955.125                   | 1   | 1955.125    | 8.675    | 0.003         | 0.009                         |
| age category                            | 243.862                    | 1   | 243,862     | 1.082    | 0.299         | 0.001                         |
| Works&school                            | 5633750                    | 3   | 1877.917    | 8.333    | 0.000         | 0.027                         |
| female * age category                   | 590,370                    | 1   | 590,370     | 2.620    | 0.106         | 0.003                         |
| female * travailecole                   | 1062.018                   | 3   | 354,006     | 1.571    | 0.195         | 0.005                         |
| age category * Works&school             | 3094.071                   | 3   | 1031.357    | 4.576    | 0.003         | 0.015                         |
| female * age category *<br>Works&school | 3604.251                   | 3   | 1201.417    | 5.331    | 0.001         | 0.017                         |
| Error                                   | 206,885.239                | 918 | 225.365     |          |               |                               |
| Total                                   | 2,463,515.625              | 934 |             |          |               |                               |
| Corrected total                         | 251,842.713                | 933 |             |          |               |                               |

R-squared = 0.179 (adjusted R-squared =0.165)

## Section S2: Tables for the factor « maltreatment »

| Factors       | values | N                   |
|---------------|--------|---------------------|
| Gender Female | 0.00   | 699                 |
|               | 1.00   | 237                 |
| Age category  | 1.00   | 8 to 13 years old   |
|               | 2.00   | 14 to 17 years old  |
| Work&school   | 1.00   | Worker no school    |
|               | 2.00   | Worker + school     |
|               | 3.00   | nonworker_no school |
|               | 4.00   | Nonworker +school   |

### Tests of beetwen-subjects effets

Dependant variable : maltreatment

|                                        | Sum of squares<br>type III | ddl | Mean square | F        | Signification | Eta-squared<br>(size effect) |
|----------------------------------------|----------------------------|-----|-------------|----------|---------------|------------------------------|
| Corrected model                        | 33,790.695                 | 15  | 2252.713    | 9.485    | 0.000         | 0.134                        |
| Constant                               | 489,566.544                | 1   | 489,566.544 | 2061.371 | 0.000         | 0.691                        |
| female                                 | 370.319                    | 1   | 370.319     | 1.559    | 0.212         | 0.002                        |
| age category                           | 1991.647                   | 1   | 1991.647    | 8.386    | 0.004         | 0.009                        |
| Works&school                           | 12,810.142                 | 3   | 4270.047    | 17.979   | 0.000         | 0.055                        |
| female * agecategory                   | 1177.176                   | 1   | 1177.176    | 4.957    | 0.026         | 0.005                        |
| female * Works&school                  | 1930.019                   | 3   | 643.340     | 2.709    | 0.044         | 0.009                        |
| agecategory *<br>Works&school          | 528.525                    | 3   | 176.175     | 0.742    | 0.527         | 0.002                        |
| female * agecategory *<br>Works&school | 2062.554                   | 3   | 687.518     | 2.895    | 0.034         | 0.009                        |
| Error                                  | 218,495.922                | 920 | 237.496     |          |               |                              |
| Total                                  | 2,124,023.438              | 936 |             |          |               |                              |
| Corrected total                        | 252,286.617                | 935 |             |          |               |                              |

R-squared = 0.134 (adjusted R- squared = 0.120)

### Section S3: Tables for the factor « personal security »

| Factors       | values | N                   |
|---------------|--------|---------------------|
| Gender Female | 0.00   | 697                 |
|               | 1.00   | 237                 |
| Age category  | 1.00   | 8 to 13 years old   |
|               | 2.00   | 14 to 17 years old  |
| Work&school   | 1.00   | Worker no school    |
|               | 2.00   | Worker + school     |
|               | 3.00   | nonworker_no school |
|               | 4.00   | Nonworker +school   |

#### Tests of between-subjects effects

Dependant variable : personal security

|                                       | Sum of squares<br>type III | ddl | Mean square | F        | Signification | Eta-squared<br>(size effect) |
|---------------------------------------|----------------------------|-----|-------------|----------|---------------|------------------------------|
| Corrected model                       | 133,388.208                | 15  | 8892.547    | 54.797   | 0.000         | 0.472                        |
| Constant                              | 786,560.211                | 1   | 786,560.211 | 4846.864 | 0.000         | 0.841                        |
| female                                | 1808.109                   | 1   | 1808.109    | 11.142   | 0.001         | 0.012                        |
| age category                          | 2.323                      | 1   | 2.323       | 0.014    | 0.905         | 0.000                        |
| Work&school                           | 83,226.661                 | 3   | 27,742.220  | 170.950  | 0.000         | 0.358                        |
| female * agecategory                  | 38.299                     | 1   | 38.299      | 0.236    | 0.627         | 0.000                        |
| female * Works&school                 | 2243.563                   | 3   | 747.854     | 4.608    | 0.003         | 0.015                        |
| agecategory *<br>Work&school          | 1815.101                   | 3   | 605.034     | 3.728    | 0.011         | 0.012                        |
| female * agecategory *<br>Work&school | 409.810                    | 3   | 136.603     | 0.842    | 0.471         | 0.003                        |
| Error                                 | 148,975.157                | 918 | 162.282     |          |               |                              |
| Total                                 | 3,669,257.813              | 934 |             |          |               |                              |
| Corrected total                       | 282,363.365                | 933 |             |          |               |                              |

R-squared = 0.472 (adjusted R-squared = 0.464)
